# Supplementary material
Source: ML conference proceedings conference paper supplement (https://openreview.net/forum?id=UIQxciuYcon)
Supplement: supplementary_material [file attachment]

## A DERIVATION FROM EQ. (8) TO (9)

$$\begin{aligned} & \arg \min_f \sum_{i=1}^n -\log \left( \frac{\sum_{j=1}^M e^{-\frac{1}{2}\|f(x_i)-f(x_j^+)\|^2}}{\sum_{k \neq i} e^{-\frac{1}{2}\|f(x_i)-f(x_k)\|^2}} \right) \\ &= \arg \min_f \sum_{i=1}^n -\log \left( \frac{\sum_{j=1}^M \frac{e^{f(x_i)^T f(x_j^+)-\frac{1}{2}\|f(x_i)\|^2-\frac{1}{2}\|f(x_j^+)\|^2}}{\sum_{k \neq i} \frac{e^{f(x_i)^T f(x_k)-\frac{1}{2}\|f(x_i)\|^2-\frac{1}{2}\|f(x_k)\|^2}}}{\sum_{k \neq i} \frac{e^{f(x_i)^T f(x_k)-\frac{1}{2}\|f(x_i)\|^2-\frac{1}{2}\|f(x_k)\|^2}}}{\sum_{k \neq i} \frac{e^{f(x_i)^T f(x_k)-1}}{\sum_{k \neq i} e^{f(x_i)^T f(x_k)-1}} \right) \end{aligned} \quad (\text{S1})$$

$$= \arg \min_f \sum_{i=1}^n -\log \left( \frac{\sum_{j=1}^M \frac{e^{f(x_i)^T f(x_j^+)-1}}{\sum_{k \neq i} \frac{e^{f(x_i)^T f(x_k)-1}}{\sum_{k \neq i} e^{f(x_i)^T f(x_k)-1}}}{\sum_{k \neq i} \frac{e^{f(x_i)^T f(x_k)-1}}{\sum_{k \neq i} e^{f(x_i)^T f(x_k)-1}} \right) \quad (\text{S2})$$

$$\begin{aligned} &= \arg \min_f \sum_{i=1}^n -\log \left( \frac{\frac{\sum_{j=1}^M e^{f(x_i)^T f(x_j^+)}}{\sum_{k \neq i} e^{f(x_i)^T f(x_k)}}}{\frac{\sum_{j=1}^M e^{f(x_i)^T f(x_j^+)}}{\sum_{k \neq i, x_k \in \{x_j^+\}} e^{f(x_i)^T f(x_k)} + \sum_{k \neq i, x_k \notin \{x_j^+\}} e^{f(x_i)^T f(x_k)}}} \right) \end{aligned} \quad (\text{S3})$$

$$= \arg \min_f \mathbb{E}_{x \sim \mathcal{D}} \left[ -\log \left( \frac{\frac{\sum_{j=1}^M e^{f(x)^T f(x_j^+)}}{\sum_{j=1}^M e^{f(x)^T f(x_j^+)} + \sum_{i=1}^N e^{f(x)^T f(x_i^-)}}}{\frac{\sum_{j=1}^M e^{f(x)^T f(x_j^+)}}{\sum_{j=1}^M e^{f(x)^T f(x_j^+)} + \sum_{i=1}^N e^{f(x)^T f(x_i^-)}}} \right) \right] \quad (\text{S4})$$

$$= \arg \min_f \mathbb{E}_{x \sim \mathcal{D}} \left[ -\log \left( \frac{\frac{\sum_{j=1}^M e^{f(x)^T f(x_j^+)}}{\sum_{j=1}^M e^{f(x)^T f(x_j^+)} + N g_0(x, \{x_i^-\}_N)}{\frac{\sum_{j=1}^M e^{f(x)^T f(x_j^+)}}{\sum_{j=1}^M e^{f(x)^T f(x_j^+)} + N g_0(x, \{x_i^-\}_N)}} \right) \right],$$

where we go from Eq. equation S1 to Eq. equation S2 based on the fact that  $\|f(x)\| = 1$ , and from Eq. equation S3 to Eq. equation S4 assuming that set  $\{x_k : k \neq i\} = \{x_j^+ : 1 \leq j \leq M\} \cup \{x_i^- : 1 \leq i \leq N\}$ .

## B COMPLETE TABLES OF RESULTS

We give the full table of results in Section 5 in the following. Notably, we gather the standard accuracy, adversarial accuracy, transfer accuracy, and transfer adversarial accuracy for each specification.

Table S1: The effectiveness evaluation of NaCl on SimCLR (i.e.  $\alpha = 0, g^1 = g_0$ ). The best performance within each loss type is in boldface. We color the overall best performance in blue.

| M | $\alpha = 0, \mathcal{L}_{\text{Na}}(g_0, M, \lambda) = \mathcal{L}_{\text{VAR}}(g_0, M)$        |                   |                   |                   |
|---|--------------------------------------------------------------------------------------------------|-------------------|-------------------|-------------------|
|   | CIFAR100 Acc.                                                                                    | FGSM Acc.         | CIFAR10 Acc.      | FGSM Acc.         |
| 1 | 53.69±0.25                                                                                       | 25.17±0.55        | 76.34±0.28        | 43.50±0.41        |
| 2 | 56.04±0.17                                                                                       | 27.19±0.79        | 77.32±0.14        | <b>44.61±0.33</b> |
| 3 | 57.11±0.21                                                                                       | 27.39±0.36        | 78.02±0.27        | 44.23±0.39        |
| 4 | 57.27±0.14                                                                                       | 27.63±0.78        | 77.91±0.29        | 42.97±0.61        |
| 5 | <b>57.91±0.12</b>                                                                                | <b>28.37±0.56</b> | <b>78.09±0.29</b> | 44.51±0.44        |
| M | $\alpha = 0, \mathcal{L}_{\text{Na}}(g_0, M, \lambda) = \mathcal{L}_{\text{BIAS}}(g_0, M)$       |                   |                   |                   |
|   | CIFAR100 Acc.                                                                                    | FGSM Acc.         | CIFAR10 Acc.      | FGSM Acc.         |
| 1 | 53.69±0.25                                                                                       | 25.17±0.55        | 76.34±0.28        | 43.50±0.41        |
| 2 | 55.72±0.15                                                                                       | 27.04±0.45        | 77.40±0.14        | 44.58±0.41        |
| 3 | 56.67±0.12                                                                                       | <b>28.41±0.24</b> | 77.53±0.24        | <b>45.21±0.89</b> |
| 4 | 57.09±0.26                                                                                       | 28.20±0.81        | 77.75±0.22        | 45.13±0.44        |
| 5 | <b>57.32±0.17</b>                                                                                | 28.33±0.59        | <b>77.93±0.40</b> | 44.46±0.53        |
| M | $\alpha = 0, \mathcal{L}_{\text{Na}}(g_0, M, \lambda) = \mathcal{L}_{\text{MIXUP}}(g_0, M, 0.5)$ |                   |                   |                   |
|   | CIFAR100 Acc.                                                                                    | FGSM Acc.         | CIFAR10 Acc.      | FGSM Acc.         |
| 1 | 53.69±0.25                                                                                       | <b>25.17±0.55</b> | 76.34±0.28        | <b>43.50±0.41</b> |
| 2 | 54.76±0.29                                                                                       | 23.66±0.27        | 76.78±0.26        | 40.76±0.66        |
| 3 | 55.21±0.17                                                                                       | 24.46±0.44        | 77.45±0.18        | 41.78±0.80        |
| 4 | 55.68±0.27                                                                                       | 24.19±0.46        | 77.40±0.24        | 41.33±0.34        |
| 5 | <b>55.85±0.16</b>                                                                                | 24.01±0.91        | <b>77.50±0.16</b> | 40.77±0.66        |
| M | $\alpha = 0, \mathcal{L}_{\text{Na}}(g_0, M, \lambda) = \mathcal{L}_{\text{MIXUP}}(g_0, M, 0.6)$ |                   |                   |                   |
|   | CIFAR100 Acc.                                                                                    | FGSM Acc.         | CIFAR10 Acc.      | FGSM Acc.         |
| 1 | 53.69±0.25                                                                                       | 25.17±0.55        | 76.34±0.28        | <b>43.50±0.41</b> |
| 2 | 54.84±0.35                                                                                       | 25.94±0.81        | 77.11±0.15        | 42.81±0.83        |
| 3 | 55.49±0.13                                                                                       | <b>26.25±0.89</b> | 76.95±0.32        | 42.99±0.96        |
| 4 | 55.65±0.24                                                                                       | 25.41±0.53        | <b>77.39±0.37</b> | 42.69±1.20        |
| 5 | <b>55.66±0.22</b>                                                                                | 26.01±0.60        | 77.26±0.48        | 43.06±0.79        |
| M | $\alpha = 0, \mathcal{L}_{\text{Na}}(g_0, M, \lambda) = \mathcal{L}_{\text{MIXUP}}(g_0, M, 0.7)$ |                   |                   |                   |
|   | CIFAR100 Acc.                                                                                    | FGSM Acc.         | CIFAR10 Acc.      | FGSM Acc.         |
| 1 | 53.69±0.25                                                                                       | 25.17±0.55        | 76.34±0.28        | 43.50±0.41        |
| 2 | 55.57±0.32                                                                                       | 27.67±0.60        | 77.09±0.27        | 44.68±0.71        |
| 3 | 55.83±0.25                                                                                       | 27.72±0.59        | 77.23±0.28        | 43.68±0.72        |
| 4 | 56.29±0.25                                                                                       | <b>27.92±0.60</b> | 77.33±0.29        | 44.69±0.82        |
| 5 | <b>56.37±0.32</b>                                                                                | 27.78±0.54        | <b>77.40±0.20</b> | <b>45.07±0.98</b> |
| M | $\alpha = 0, \mathcal{L}_{\text{Na}}(g_0, M, \lambda) = \mathcal{L}_{\text{MIXUP}}(g_0, M, 0.8)$ |                   |                   |                   |
|   | CIFAR100 Acc.                                                                                    | FGSM Acc.         | CIFAR10 Acc.      | FGSM Acc.         |
| 1 | 53.69±0.25                                                                                       | 25.17±0.55        | 76.34±0.28        | 43.50±0.41        |
| 2 | 55.75±0.21                                                                                       | 29.30±0.86        | 76.80±0.20        | 46.56±1.02        |
| 3 | 56.27±0.26                                                                                       | <b>29.96±0.29</b> | 77.11±0.37        | 46.52±0.50        |
| 4 | <b>56.39±0.26</b>                                                                                | 29.49±0.65        | 77.34±0.31        | 46.79±0.93        |
| 5 | 56.23±0.13                                                                                       | 29.47±0.95        | <b>77.40±0.14</b> | <b>47.36±0.69</b> |
| M | $\alpha = 0, \mathcal{L}_{\text{Na}}(g_0, M, \lambda) = \mathcal{L}_{\text{MIXUP}}(g_0, M, 0.9)$ |                   |                   |                   |
|   | CIFAR100 Acc.                                                                                    | FGSM Acc.         | CIFAR10 Acc.      | FGSM Acc.         |
| 1 | 53.69±0.25                                                                                       | 25.17±0.55        | 76.34±0.28        | 43.50±0.41        |
| 2 | 56.20±0.33                                                                                       | 30.95±0.36        | 76.96±0.15        | <b>48.85±0.75</b> |
| 3 | 56.41±0.13                                                                                       | <b>30.98±0.90</b> | 77.10±0.21        | 48.76±0.63        |
| 4 | 56.00±0.42                                                                                       | 29.90±0.63        | <b>77.11±0.40</b> | 48.16±0.40        |
| 5 | <b>56.63±0.31</b>                                                                                | 30.58±0.52        | 77.04±0.19        | 47.96±0.46        |

Table S2: The effectiveness evaluation of NaCl on Debised+HardNeg (i.e.  $\alpha = 0, g^1 = g_2$ ). The best performance within each loss type is in boldface. We color the overall best performance in blue.

| M | $\alpha = 0, \mathcal{L}_{\text{Na}}(g_2, M, \lambda) = \mathcal{L}_{\text{VAR}}(g_2, M)$        |                   |                   |                   |
|---|--------------------------------------------------------------------------------------------------|-------------------|-------------------|-------------------|
|   | CIFAR100 Acc.                                                                                    | FGSM Acc.         | CIFAR10 Acc.      | FGSM Acc.         |
| 1 | 56.83±0.20                                                                                       | 31.03±0.41        | 77.24±0.29        | <b>48.38±0.70</b> |
| 2 | 58.17±0.39                                                                                       | 31.92±0.45        | 77.43±0.18        | 48.05±0.38        |
| 3 | 59.08±0.29                                                                                       | 32.63±0.74        | 77.87±0.29        | 47.58±0.57        |
| 4 | 59.29±0.16                                                                                       | 32.48±0.62        | 77.92±0.17        | 47.08±0.53        |
| 5 | <b>59.67±0.38</b>                                                                                | <b>33.10±0.71</b> | <b>78.04±0.09</b> | 46.90±0.91        |
|   | $\alpha = 0, \mathcal{L}_{\text{Na}}(g_2, M, \lambda) = \mathcal{L}_{\text{BIAS}}(g_2, M)$       |                   |                   |                   |
| 1 | 56.83±0.20                                                                                       | 31.03±0.41        | 77.24±0.29        | 48.38±0.70        |
| 2 | 57.87±0.15                                                                                       | 32.50±0.48        | 77.43±0.11        | 48.14±0.31        |
| 3 | 58.42±0.23                                                                                       | <b>33.19±0.60</b> | 77.41±0.17        | 48.09±0.93        |
| 4 | <b>58.86±0.18</b>                                                                                | 32.65±1.07        | 77.46±0.29        | <b>48.43±0.94</b> |
| 5 | 58.81±0.21                                                                                       | 32.86±0.47        | <b>77.58±0.23</b> | 48.30±0.39        |
|   | $\alpha = 0, \mathcal{L}_{\text{Na}}(g_2, M, \lambda) = \mathcal{L}_{\text{MIXUP}}(g_2, M, 0.5)$ |                   |                   |                   |
| 1 | 56.83±0.20                                                                                       | 31.03±0.41        | 77.24±0.29        | 48.38±0.70        |
| 2 | <b>60.69±2.43</b>                                                                                | <b>32.22±0.35</b> | 79.36±0.65        | 48.86±0.34        |
| 3 | 59.81±0.25                                                                                       | 32.04±0.67        | 79.41±0.17        | 48.91±0.81        |
| 4 | 59.75±0.33                                                                                       | 32.03±0.34        | 79.42±0.18        | <b>49.05±0.71</b> |
| 5 | 59.85±0.30                                                                                       | 32.06±0.72        | <b>79.45±0.20</b> | 48.32±0.70        |
|   | $\alpha = 0, \mathcal{L}_{\text{Na}}(g_2, M, \lambda) = \mathcal{L}_{\text{MIXUP}}(g_2, M, 0.6)$ |                   |                   |                   |
| 1 | 56.83±0.20                                                                                       | 31.03±0.41        | 77.24±0.29        | 48.38±0.70        |
| 2 | 58.94±0.29                                                                                       | 32.65±0.36        | 78.67±0.15        | <b>49.86±0.59</b> |
| 3 | 59.43±0.35                                                                                       | 32.91±0.40        | 78.94±0.19        | 48.84±1.09        |
| 4 | <b>59.54±0.28</b>                                                                                | 33.02±0.62        | 78.92±0.29        | 49.64±0.74        |
| 5 | 59.52±0.28                                                                                       | <b>33.10±0.50</b> | <b>79.29±0.21</b> | 49.39±1.02        |
|   | $\alpha = 0, \mathcal{L}_{\text{Na}}(g_2, M, \lambda) = \mathcal{L}_{\text{MIXUP}}(g_2, M, 0.7)$ |                   |                   |                   |
| 1 | 56.83±0.20                                                                                       | 31.03±0.41        | 77.24±0.29        | 48.38±0.70        |
| 2 | 58.24±0.19                                                                                       | 33.24±0.90        | 78.30±0.31        | <b>50.40±0.83</b> |
| 3 | 58.74±0.26                                                                                       | 33.12±0.59        | 78.49±0.30        | 49.85±0.38        |
| 4 | 58.79±0.38                                                                                       | <b>33.63±0.53</b> | 78.51±0.29        | 49.88±0.75        |
| 5 | <b>58.99±0.18</b>                                                                                | 32.93±0.81        | <b>78.57±0.12</b> | 49.53±1.55        |
|   | $\alpha = 0, \mathcal{L}_{\text{Na}}(g_2, M, \lambda) = \mathcal{L}_{\text{MIXUP}}(g_2, M, 0.8)$ |                   |                   |                   |
| 1 | 56.83±0.20                                                                                       | 31.03±0.41        | 77.24±0.29        | 48.38±0.70        |
| 2 | 57.60±0.15                                                                                       | 34.14±0.22        | <b>77.96±0.07</b> | <b>51.82±0.68</b> |
| 3 | 58.04±0.28                                                                                       | 33.93±0.45        | 77.55±0.18        | 50.30±0.81        |
| 4 | 58.05±0.16                                                                                       | <b>34.16±0.54</b> | 77.90±0.21        | 50.40±0.43        |
| 5 | <b>58.43±0.27</b>                                                                                | 33.87±0.62        | 77.90±0.17        | 50.78±0.95        |
|   | $\alpha = 0, \mathcal{L}_{\text{Na}}(g_2, M, \lambda) = \mathcal{L}_{\text{MIXUP}}(g_2, M, 0.9)$ |                   |                   |                   |
| 1 | 56.83±0.20                                                                                       | 31.03±0.41        | 77.24±0.29        | 48.38±0.70        |
| 2 | 57.16±0.15                                                                                       | 34.25±0.55        | 77.19±0.09        | <b>51.42±0.45</b> |
| 3 | 57.08±0.10                                                                                       | 33.96±0.19        | 77.21±0.26        | 51.30±1.05        |
| 4 | 57.36±0.19                                                                                       | <b>34.29±0.15</b> | <b>77.34±0.34</b> | 51.16±0.55        |
| 5 | <b>57.38±0.16</b>                                                                                | 34.25±0.30        | 77.13±0.16        | 50.68±0.74        |

Table S3: The effectiveness evaluation of NaCl ( $M \neq 1$ ) on IntCl ( $M = 1$ ) when  $\alpha = 1, g^1 = g^2 = g_2$ . The best performance within each loss type is in boldface. We color the overall best performance in blue.

| M                                                                                                   | $\alpha \neq 0, \mathcal{L}_{\text{Na}}(g_2, M, \lambda) = \mathcal{L}_{\text{VAR}}(g_2, M)$ |                   |                   |                   |
|-----------------------------------------------------------------------------------------------------|----------------------------------------------------------------------------------------------|-------------------|-------------------|-------------------|
|                                                                                                     | CIFAR100 Acc.                                                                                | FGSM Acc.         | CIFAR10 Acc.      | FGSM Acc.         |
| 1                                                                                                   | 56.22±0.15                                                                                   | 40.05±0.67        | 76.39±0.10        | <b>59.33±0.94</b> |
| 2                                                                                                   | 57.51±0.12                                                                                   | 41.01±0.36        | 76.88±0.49        | 58.77±0.67        |
| 3                                                                                                   | 58.08±0.18                                                                                   | 41.02±0.83        | 76.95±0.19        | 58.28±0.50        |
| 4                                                                                                   | 58.31±0.23                                                                                   | <b>41.49±0.51</b> | 77.30±0.30        | 58.61±0.80        |
| 5                                                                                                   | <b>58.64±0.24</b>                                                                            | 40.50±0.23        | <b>77.42±0.17</b> | 58.11±0.72        |
| $\alpha \neq 0, \mathcal{L}_{\text{Na}}(g_2, M, \lambda) = \mathcal{L}_{\text{BIAS}}(g_2, M)$       |                                                                                              |                   |                   |                   |
| 1                                                                                                   | 56.22±0.15                                                                                   | 40.05±0.67        | 76.39±0.10        | <b>59.33±0.94</b> |
| 2                                                                                                   | 56.71±0.11                                                                                   | 39.80±0.57        | 76.55±0.27        | 58.44±0.31        |
| 3                                                                                                   | 57.13±0.26                                                                                   | 40.53±0.29        | <b>76.67±0.22</b> | 58.47±0.31        |
| 4                                                                                                   | 57.06±0.19                                                                                   | 40.85±0.31        | 76.34±0.22        | 58.91±0.62        |
| 5                                                                                                   | <b>57.46±0.04</b>                                                                            | <b>41.00±0.86</b> | 76.60±0.37        | 57.98±0.47        |
| $\alpha \neq 0, \mathcal{L}_{\text{Na}}(g_2, M, \lambda) = \mathcal{L}_{\text{MIXUP}}(g_2, M, 0.5)$ |                                                                                              |                   |                   |                   |
| 1                                                                                                   | 56.22±0.15                                                                                   | 40.05±0.67        | 76.39±0.10        | 59.33±0.94        |
| 2                                                                                                   | 58.97±0.19                                                                                   | 40.25±0.52        | 78.61±0.20        | 58.41±0.59        |
| 3                                                                                                   | 59.26±0.18                                                                                   | 40.96±0.58        | <b>78.83±0.22</b> | 59.20±1.25        |
| 4                                                                                                   | 59.32±0.21                                                                                   | 40.82±0.54        | 78.83±0.27        | 59.03±0.52        |
| 5                                                                                                   | <b>59.43±0.23</b>                                                                            | <b>41.01±0.34</b> | 78.80±0.21        | <b>59.51±0.93</b> |
| $\alpha \neq 0, \mathcal{L}_{\text{Na}}(g_2, M, \lambda) = \mathcal{L}_{\text{MIXUP}}(g_2, M, 0.6)$ |                                                                                              |                   |                   |                   |
| 1                                                                                                   | 56.22±0.15                                                                                   | 40.05±0.67        | 76.39±0.10        | 59.33±0.94        |
| 2                                                                                                   | 58.55±0.34                                                                                   | <b>40.85±0.62</b> | 78.34±0.22        | <b>59.56±0.88</b> |
| 3                                                                                                   | 59.05±0.21                                                                                   | 40.83±0.44        | 78.41±0.12        | 59.14±0.78        |
| 4                                                                                                   | 59.06±0.25                                                                                   | 40.80±0.89        | 78.61±0.22        | 58.41±1.00        |
| 5                                                                                                   | <b>59.10±0.23</b>                                                                            | 40.68±0.50        | <b>78.63±0.21</b> | 58.92±0.76        |
| $\alpha \neq 0, \mathcal{L}_{\text{Na}}(g_2, M, \lambda) = \mathcal{L}_{\text{MIXUP}}(g_2, M, 0.7)$ |                                                                                              |                   |                   |                   |
| 1                                                                                                   | 56.22±0.15                                                                                   | 40.05±0.67        | 76.39±0.10        | 59.33±0.94        |
| 2                                                                                                   | 58.00±0.18                                                                                   | 40.35±0.34        | 77.73±0.24        | 59.40±1.27        |
| 3                                                                                                   | 58.23±0.18                                                                                   | 40.94±0.75        | 77.91±0.25        | <b>59.57±0.81</b> |
| 4                                                                                                   | 58.20±0.25                                                                                   | 40.95±0.45        | 77.89±0.20        | 59.49±0.49        |
| 5                                                                                                   | <b>58.37±0.14</b>                                                                            | <b>41.15±0.48</b> | <b>78.27±0.26</b> | 59.17±0.94        |
| $\alpha \neq 0, \mathcal{L}_{\text{Na}}(g_2, M, \lambda) = \mathcal{L}_{\text{MIXUP}}(g_2, M, 0.8)$ |                                                                                              |                   |                   |                   |
| 1                                                                                                   | 56.22±0.15                                                                                   | 40.05±0.67        | 76.39±0.10        | 59.33±0.94        |
| 2                                                                                                   | 57.07±0.24                                                                                   | 41.29±0.57        | 77.27±0.28        | 60.16±0.51        |
| 3                                                                                                   | <b>57.62±0.22</b>                                                                            | 40.93±0.49        | 77.54±0.27        | 59.47±0.52        |
| 4                                                                                                   | 57.61±0.25                                                                                   | <b>41.36±0.41</b> | 77.50±0.34        | <b>60.28±0.68</b> |
| 5                                                                                                   | 57.56±0.18                                                                                   | 40.71±0.34        | <b>77.58±0.42</b> | 59.99±0.30        |
| $\alpha \neq 0, \mathcal{L}_{\text{Na}}(g_2, M, \lambda) = \mathcal{L}_{\text{MIXUP}}(g_2, M, 0.9)$ |                                                                                              |                   |                   |                   |
| 1                                                                                                   | 56.22±0.15                                                                                   | 40.05±0.67        | 76.39±0.10        | 59.33±0.94        |
| 2                                                                                                   | 56.54±0.33                                                                                   | 40.85±0.13        | 76.81±0.22        | 60.40±0.46        |
| 3                                                                                                   | 56.69±0.11                                                                                   | 41.23±0.66        | <b>76.98±0.22</b> | 60.13±0.56        |
| 4                                                                                                   | 56.43±0.26                                                                                   | <b>41.56±0.56</b> | 76.97±0.20        | <b>61.21±0.49</b> |
| 5                                                                                                   | <b>56.86±0.11</b>                                                                            | 41.09±0.31        | 76.91±0.21        | 60.09±0.39        |

## C ADVERSARIAL ACCURACY

For a more comprehensive study of adversarial robustness, we extend Table S2 to include PGD attack results with the same strength as FGSM attacks ( $\epsilon = 0.002$ ). One can readily see from Table S4 that the adversarial accuracy under PGD attacks of the same magnitude is slightly lower (roughly 2-3% lower) as PGD is a stronger attack. Nevertheless, the trend is consistent – the models that exhibit better adversarial robustness w.r.t. FGSM attacks also demonstrate superior adversarial robustness w.r.t. PGD attacks.

Table S4: The complete Table S2 (Table 1 right column) with additional PGD accuracy.

| M                                                                                                | $\alpha = 0, \mathcal{L}_{\text{Na}}(g_2, M, \lambda) = \mathcal{L}_{\text{VAR}}(g_2, M)$ |                   |                   |                   |                   |                   |
|--------------------------------------------------------------------------------------------------|-------------------------------------------------------------------------------------------|-------------------|-------------------|-------------------|-------------------|-------------------|
|                                                                                                  | CIFAR100 Acc.                                                                             | FGSM Acc.         | PGD Acc.          | CIFAR10 Acc.      | FGSM Acc.         | PGD Acc.          |
| 1                                                                                                | 56.83±0.20                                                                                | 31.03±0.41        | 28.80±0.48        | 77.24±0.29        | <b>48.38±0.70</b> | <b>46.24±0.77</b> |
| 2                                                                                                | 58.17±0.39                                                                                | 31.92±0.45        | 29.77±0.43        | 77.43±0.18        | 48.05±0.38        | 45.63±0.50        |
| 3                                                                                                | 59.08±0.29                                                                                | 32.63±0.74        | 30.33±0.84        | 77.87±0.29        | 47.58±0.57        | 45.02±0.62        |
| 4                                                                                                | 59.29±0.16                                                                                | 32.48±0.62        | 30.12±0.73        | 77.92±0.17        | 47.08±0.53        | 44.52±0.54        |
| 5                                                                                                | <b>59.67±0.38</b>                                                                         | <b>33.10±0.71</b> | <b>30.87±0.88</b> | <b>78.04±0.09</b> | 46.90±0.91        | 44.20±1.08        |
| $\alpha = 0, \mathcal{L}_{\text{Na}}(g_2, M, \lambda) = \mathcal{L}_{\text{BIAS}}(g_2, M)$       |                                                                                           |                   |                   |                   |                   |                   |
| 1                                                                                                | 56.83±0.20                                                                                | 31.03±0.41        | 28.80±0.48        | 77.24±0.29        | 48.38±0.70        | <b>46.24±0.77</b> |
| 2                                                                                                | 57.87±0.15                                                                                | 32.50±0.48        | 30.25±0.60        | 77.43±0.11        | 48.14±0.31        | 45.81±0.43        |
| 3                                                                                                | 58.42±0.23                                                                                | <b>33.19±0.60</b> | <b>30.93±0.59</b> | 77.41±0.17        | 48.09±0.93        | 45.67±0.93        |
| 4                                                                                                | <b>58.86±0.18</b>                                                                         | 32.65±1.07        | 30.22±1.09        | 77.46±0.29        | <b>48.43±0.94</b> | 45.99±1.15        |
| 5                                                                                                | 58.81±0.21                                                                                | 32.86±0.47        | 30.57±0.55        | <b>77.58±0.23</b> | 48.30±0.39        | 45.80±0.48        |
| $\alpha = 0, \mathcal{L}_{\text{Na}}(g_2, M, \lambda) = \mathcal{L}_{\text{MIXUP}}(g_2, M, 0.5)$ |                                                                                           |                   |                   |                   |                   |                   |
| 1                                                                                                | 56.83±0.20                                                                                | 31.03±0.41        | 28.80±0.48        | 77.24±0.29        | 48.38±0.70        | 46.24±0.77        |
| 2                                                                                                | <b>60.69±2.43</b>                                                                         | <b>32.22±0.35</b> | <b>30.11±0.43</b> | 79.36±0.65        | 48.86±0.34        | 46.67±0.40        |
| 3                                                                                                | 59.81±0.25                                                                                | 32.04±0.67        | 29.87±0.65        | 79.41±0.17        | 48.91±0.81        | 46.61±0.86        |
| 4                                                                                                | 59.75±0.33                                                                                | 32.03±0.34        | 29.85±0.36        | 79.42±0.18        | <b>49.05±0.71</b> | <b>46.70±0.80</b> |
| 5                                                                                                | 59.85±0.30                                                                                | 32.06±0.72        | 29.99±0.76        | <b>79.45±0.20</b> | 48.32±0.70        | 45.89±0.82        |
| $\alpha = 0, \mathcal{L}_{\text{Na}}(g_2, M, \lambda) = \mathcal{L}_{\text{MIXUP}}(g_2, M, 0.6)$ |                                                                                           |                   |                   |                   |                   |                   |
| 1                                                                                                | 56.83±0.20                                                                                | 31.03±0.41        | 28.80±0.48        | 77.24±0.29        | 48.38±0.70        | 46.24±0.77        |
| 2                                                                                                | 58.94±0.29                                                                                | 32.65±0.36        | 30.16±0.27        | 78.67±0.15        | <b>49.86±0.59</b> | <b>47.38±0.70</b> |
| 3                                                                                                | 59.43±0.35                                                                                | 32.91±0.40        | 30.36±0.52        | 78.94±0.19        | 48.84±1.09        | 46.24±1.32        |
| 4                                                                                                | <b>59.54±0.28</b>                                                                         | 33.02±0.62        | <b>30.68±0.72</b> | 78.92±0.29        | 49.64±0.74        | 47.15±0.88        |
| 5                                                                                                | 59.52±0.28                                                                                | <b>33.10±0.50</b> | 30.63±0.48        | <b>79.29±0.21</b> | 49.39±1.02        | 46.89±1.12        |
| $\alpha = 0, \mathcal{L}_{\text{Na}}(g_2, M, \lambda) = \mathcal{L}_{\text{MIXUP}}(g_2, M, 0.7)$ |                                                                                           |                   |                   |                   |                   |                   |
| 1                                                                                                | 56.83±0.20                                                                                | 31.03±0.41        | 28.80±0.48        | 77.24±0.29        | 48.38±0.70        | 46.24±0.77        |
| 2                                                                                                | 58.24±0.19                                                                                | 33.24±0.90        | 30.40±1.06        | 78.30±0.31        | <b>50.40±0.83</b> | <b>47.50±0.89</b> |
| 3                                                                                                | 58.74±0.26                                                                                | 33.12±0.59        | 29.94±0.62        | 78.49±0.30        | 49.85±0.38        | 46.69±0.32        |
| 4                                                                                                | 58.79±0.38                                                                                | <b>33.63±0.53</b> | <b>30.70±0.60</b> | 78.51±0.29        | 49.88±0.75        | 47.01±0.96        |
| 5                                                                                                | <b>58.99±0.18</b>                                                                         | 32.93±0.81        | 29.89±0.99        | <b>78.57±0.12</b> | 49.53±1.55        | 46.41±1.91        |
| $\alpha = 0, \mathcal{L}_{\text{Na}}(g_2, M, \lambda) = \mathcal{L}_{\text{MIXUP}}(g_2, M, 0.8)$ |                                                                                           |                   |                   |                   |                   |                   |
| 1                                                                                                | 56.83±0.20                                                                                | 31.03±0.41        | 28.80±0.48        | 77.24±0.29        | 48.38±0.70        | 46.24±0.77        |
| 2                                                                                                | 57.60±0.15                                                                                | 34.14±0.22        | 31.35±0.25        | <b>77.96±0.07</b> | <b>51.82±0.68</b> | <b>48.81±0.85</b> |
| 3                                                                                                | 58.04±0.28                                                                                | 33.93±0.45        | 31.31±0.62        | 77.55±0.18        | 50.30±0.81        | 47.41±0.76        |
| 4                                                                                                | 58.05±0.16                                                                                | <b>34.16±0.54</b> | <b>31.41±0.61</b> | 77.90±0.21        | 50.40±0.43        | 47.58±0.47        |
| 5                                                                                                | <b>58.43±0.27</b>                                                                         | 33.87±0.62        | 31.23±0.76        | 77.90±0.17        | 50.78±0.95        | 47.96±1.12        |
| $\alpha = 0, \mathcal{L}_{\text{Na}}(g_2, M, \lambda) = \mathcal{L}_{\text{MIXUP}}(g_2, M, 0.9)$ |                                                                                           |                   |                   |                   |                   |                   |
| 1                                                                                                | 56.83±0.20                                                                                | 31.03±0.41        | 28.80±0.48        | 77.24±0.29        | 48.38±0.70        | 46.24±0.77        |
| 2                                                                                                | 57.16±0.15                                                                                | 34.25±0.55        | 31.83±0.57        | 77.19±0.09        | <b>51.42±0.45</b> | <b>49.09±0.53</b> |
| 3                                                                                                | 57.08±0.10                                                                                | 33.96±0.19        | 31.56±0.34        | 77.21±0.26        | 51.30±1.05        | 48.60±1.28        |
| 4                                                                                                | 57.36±0.19                                                                                | <b>34.29±0.15</b> | <b>31.93±0.32</b> | <b>77.34±0.34</b> | 51.16±0.55        | 48.64±0.61        |
| 5                                                                                                | <b>57.38±0.16</b>                                                                         | 34.25±0.30        | 31.89±0.26        | 77.13±0.16        | 50.68±0.74        | 48.14±0.83        |

In Figure S1, we show the adversarial accuracy as a function of the FGSM attack strength  $\epsilon$ . Specifically, we range the attack strength from 0.002 to 0.032 and give the adversarial accuracy of our proposals (IntCl & IntNaCl) together with baselines under all attacks. From Figure S1, one can see that among all baselines, AdvW demonstrates the best adversarial robustness, whereas our proposals still consistently win over it by a noticeable margin.

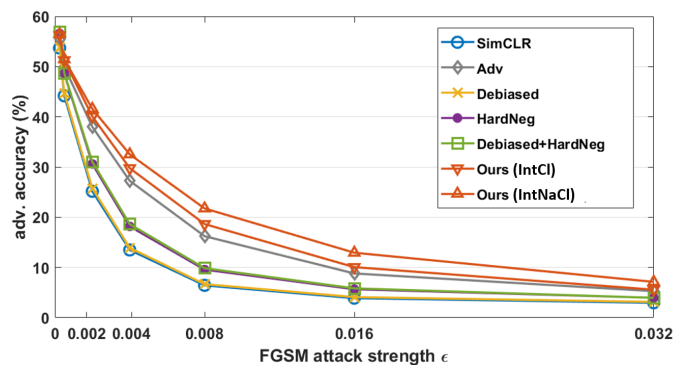

Figure S1: The adversarial accuracy under FGSM attacks of different strength on CIFAR100.

## D THE EFFECT OF $\lambda$

To investigate the effect of  $\lambda$  on different metrics, we include in Figure S2 the standard and adversarial accuracy on CIFAR100 and CIFAR10 as functions of  $\lambda$ . Intriguingly, we see that all the accuracy curves in Figure S2(a) have tended to increase over  $\lambda$ . Comparatively, two of the accuracy curves in Figure S2(b), the standard accuracy on CIFAR100 and CIFAR10, show downward trends. One plausible reason is related to the room for improvements of individual baselines. Since Debiased+HardNeg is a much stronger baseline than SimCLR, it is closer to the robustness-accuracy trade-off.

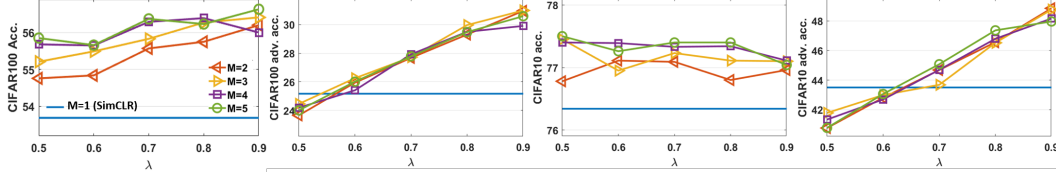

(a) NaCl on SimCLR, i.e.  $\alpha = 0$ ,  $\mathcal{L}_{Na} = \mathcal{L}_{MIXUP}$ ,  $g^1 = g_0$  in Equation 10

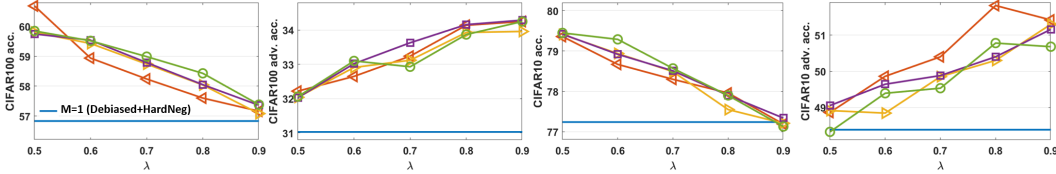

(b) NaCl on Debiased+HardNeg, i.e.  $\alpha = 0$ ,  $\mathcal{L}_{Na} = \mathcal{L}_{MIXUP}$ ,  $g^1 = g_2$  in Equation 10

Figure S2: The standard and adversarial accuracy (%) on CIFAR100 and CIFAR10 as functions of  $\lambda$ .

## E EXTENDED RUNTIME

| #epoch                                    | 100   | 200   | 400   | 600          | 800          | 1000         |
|-------------------------------------------|-------|-------|-------|--------------|--------------|--------------|
| $\mathcal{L}_{\text{SimCLR}}$             | 53.69 | 57.45 | 60.06 | 60.96        | 61.27        | <b>61.90</b> |
| $\mathcal{L}_{\text{VAR}}(g_0, 2)$        | 56.04 | 59.44 | 61.42 | <b>62.37</b> | 62.06        | -            |
| $\mathcal{L}_{\text{BIAS}}(g_0, 2)$       | 55.72 | 59.31 | 61.19 | 61.66        | <b>62.49</b> | -            |
| $\mathcal{L}_{\text{MIXUP}}(g_0, 2, 0.9)$ | 56.20 | 58.98 | 61.81 | 62.43        | <b>62.46</b> | -            |
| $\mathcal{L}_{\text{Debiased+HardNeg}}$   | 56.83 | 59.35 | 61.77 | <b>62.74</b> | 62.68        | -            |
| $\mathcal{L}_{\text{VAR}}(g_2, 2)$        | 58.17 | 60.66 | 62.38 | 63.43        | <b>63.51</b> | -            |
| $\mathcal{L}_{\text{BIAS}}(g_2, 2)$       | 57.87 | 60.06 | 62.36 | 62.58        | <b>62.86</b> | -            |
| $\mathcal{L}_{\text{MIXUP}}(g_2, 2, 0.5)$ | 60.69 | 62.14 | 64.06 | <b>65.59</b> | 65.53        | -            |

Table S5: The CIFAR100 linear evaluation results (%) after different numbers of training epochs.



## F EXPERIMENTAL DETAILS

**Architecture.** We follow [4,16] to incorporate an MLP projection head during the contrastive learning on resnet18.

**Optimizer.** Adam optimizer with a learning rate of  $3e - 4$ .

**Batching.** A batch size of 256 is used across all the experiments.

**Methodological hyperparameters.** Throughout our experiments, we use  $\tau^+ = 0.01$  and  $\beta = 1.0$  for  $\mathcal{L}_{\text{Debiased}}$  [5] and  $\mathcal{L}_{\text{Debiased+HardNeg}}$  [16],  $\alpha = 1$  for  $\mathcal{L}_{\text{Adv}}$  [12]. The same set of hyperparameters are used in our IntCl and IntNaCl.

**Data augmentation.** Our data augmentation includes random resized crop, random horizontal flip, random grayscale, and color jitter. Specifically, we implement the color jitter by calling *torchvision.transforms.ColorJitter*( $0.8 * s, 0.8 * s, 0.8 * s, 0.2 * s$ ) and execute with probability 0.8. Random grayscale is performed with probability 0.2.

**Adversarial hyperparameters.** When evaluating the adversarial robustness using the codebase provided in [32], we use a PGD step size of  $1e - 2$ , 10 iterations, and 2 random restarts.

**Error bar.** We run five independent trials for each of the experiments and report the mean and standard deviation for all tables and figures. The error bars in Figure S1 is omitted for better visual clarity.

## G SUPERVISED LEARNING BASELINE

We give in the following the standard and adversarial accuracy of a supervised learning baseline with the same network architecture, optimizer, and batch size. In our self-supervised representation learning experiments, we train the representation network for 100 epochs and train the downstream fully-connected classifying layer for 1000 epochs. Therefore, to obtain a fair supervised learning baseline, we train the complete network end-to-end for 1000 epochs. We follow the same procedures in evaluating the transfer standard accuracy and adversarial accuracy as described in Section 5.

CIFAR100 (std. acc., FGSM acc., PGD acc.):  $65.16 \pm 0.32$ ,  $35.89 \pm 0.23$ ,  $32.62 \pm 0.23$ .

Transfer CIFAR10 (std. acc., FGSM acc., PGD acc.):  $77.45 \pm 0.21$ ,  $44.39 \pm 0.47$ ,  $40.35 \pm 0.52$ .
